# Supplementary material
Source: Springer Nature journal article supplement (https://www.springermedizin.de/resource/supplementary/12884_2009_294_MOESM2_ESM.pdf/9457398)

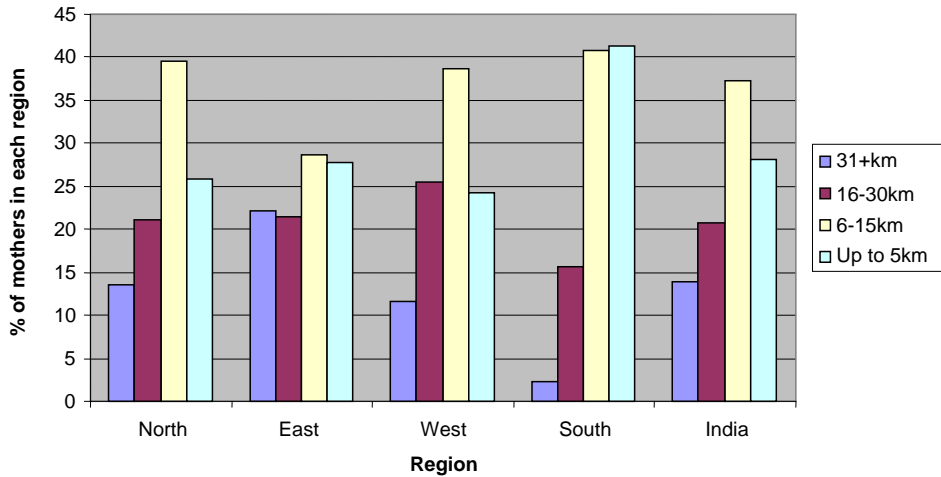

Supplement: MOESM2 [file 9457398]
